# Supplementary material
Source: publisher site journal article supplement (https://www.dovepress.com/article/312416)
Supplement: Supplementary file 1 [file get_supplementary_file.php]

**Table S1.** 334 high-confidence SARS-CoV-2 proteins binding human mRNAs

| Gene symbol | Covid-19 bait | Tissue specificity | Subcellular location (main) |
| --- | --- | --- | --- |
| AAR2 | SARS-CoV2 M | Low tissue specificity | Cytosol |
| AASS | SARS-CoV2 M | Low tissue specificity | Mitochondria |
| AATF | SARS-CoV2 nsp8 | Low tissue specificity | Nucleoli |
| ABCC1 | SARS-CoV2 orf9c | Low tissue specificity | Plasma membrane |
| ACAD9 | SARS-CoV2 orf9c | Low tissue specificity | Mitochondria |
| ACADM | SARS-CoV2 M | Tissue enhanced (liver, skeletal muscle) | Mitochondria |
| ACE2 |  | Tissue enriched (intestine) | N/A |
| ACSL3 | SARS-CoV2 nsp7 | Tissue enriched (parathyroid gland) | Nucleoli |
| ADAM9 | SARS-CoV2 orf8 | Low tissue specificity | Vesicles |
| ADAMTS1 | SARS-CoV2 orf8 | Tissue enhanced (ovary) | Plasma membrane |
| AES | SARS-CoV2 nsp13 | Low tissue specificity | Nucleoplasm |
| AGPS | SARS-CoV2 nsp7 | Low tissue specificity | Peroxisomes |
| AKAP8 | SARS-CoV2 nsp12 | Low tissue specificity | Nucleoplasm |
| AKAP8L | SARS-CoV2 M | Low tissue specificity | Nuclear speckles |
| AKAP9 | SARS-CoV2 nsp13 | Low tissue specificity | Golgi apparatus |
| ALG11 | SARS-CoV2 nsp4 | Low tissue specificity | N/A |
| ALG5 | SARS-CoV2 orf3a | Low tissue specificity | Cytosol |
| ALG8 | SARS-CoV2 orf9c | Low tissue specificity | Nucleoplasm |
| ANO6 | SARS-CoV2 M | Low tissue specificity | Plasma membrane, Cytosol |
| AP2A2 | SARS-CoV2 nsp10 | Low tissue specificity | Vesicles |
| AP2M1 | SARS-CoV2 nsp10 | Low tissue specificity | Plasma membrane |
| AP3B1 | SARS-CoV2 E | Low tissue specificity | Nucleoplasm |
| ARF6 | SARS-CoV2 nsp15 | Low tissue specificity | N/A |
| ARL6IP6 | SARS-CoV2 orf3a | Tissue enhanced (blood) | Nuclear membrane |
| ATE1 | SARS-CoV2 nsp8 | Low tissue specificity | Nucleoplasm |
| ATP13A3 | SARS-CoV2 nsp6 | Low tissue specificity | Nucleoli |
| ATP1B1 | SARS-CoV2 M | Tissue enhanced (kidney) | N/A |
| ATP5MG | SARS-CoV2 nsp6 | Low tissue specificity | Mitochondria |
| ATP6AP1 | SARS-CoV2 nsp6 | Low tissue specificity | Plasma membrane, Microtubules, Cytosol |
| ATP6V1A | SARS-CoV2 M | Low tissue specificity | Nucleoplasm, Vesicles |
| BAG5 | SARS-CoV2 orf9b | Tissue enhanced (testis) | Vesicles |
| BCKDK | SARS-CoV2 nsp12 | Low tissue specificity | Mitochondria |
| BCS1L | SARS-CoV2 orf9c | Low tissue specificity | N/A |
| BRD2 | SARS-CoV2 E | Low tissue specificity | Nuclear speckles |
| BRD4 | SARS-CoV2 E | Low tissue specificity | Nucleoplasm |
| BZW2 | SARS-CoV2 M | Tissue enhanced (placenta, skeletal muscle) | Plasma membrane, Actin filaments, Cytosol |
| C1orf50 | SARS-CoV2 nsp13 | Low tissue specificity | N/A |
| CCDC86 | SARS-CoV2 nsp8 | Tissue enriched (parathyroid gland) | Nucleoli |
| CDK5RAP2 | SARS-CoV2 nsp13 | Low tissue specificity | Centrosome |
| CENPF | SARS-CoV2 nsp13 | Group enriched (bone marrow, lymphoid tissue) | Nucleoplasm |
| CEP112 | SARS-CoV2 nsp13 | Tissue enhanced (testis) | Golgi apparatus |
| CEP135 | SARS-CoV2 nsp13 | Tissue enhanced (lymphoid tissue) | Focal adhesion sites |
| CEP250 | SARS-CoV2 nsp13 | Low tissue specificity | Centrosome |
| CEP350 | SARS-CoV2 nsp13 | Low tissue specificity | Centrosome |
| CEP68 | SARS-CoV2 nsp13 | Low tissue specificity | Nucleoplasm, Centriolar satellite |
| CHMP2A | SARS-CoV2 orf9b | Low tissue specificity | Cytosol |
| CHPF | SARS-CoV2 orf8 | Low tissue specificity | Cytosol |
| CHPF2 | SARS-CoV2 orf8 | Low tissue specificity | Nucleoplasm, Cytosol |
| CISD3 | SARS-CoV2 orf8 | Low tissue specificity | N/A |
| CIT | SARS-CoV2 nsp13 | Tissue enhanced (bone marrow, brain) | Cytosol |
| CLCC1 | SARS-CoV2 orf3a | Low tissue specificity | Endoplasmic reticulum |
| CLIP4 | SARS-CoV2 nsp13 | Low tissue specificity | Vesicles |
| CNTRL | SARS-CoV2 nsp13 | Low tissue specificity | Centrosome |
| COL6A1 | SARS-CoV2 orf8 | Low tissue specificity | Cytosol |
| COLGALT1 | SARS-CoV2 nsp1 | Low tissue specificity | Vesicles |
| COMT | SARS-CoV2 nsp7 | Tissue enhanced (liver) | Vesicles |
| COQ8B | SARS-CoV2 M | Low tissue specificity | Mitochondria |
| CRTC3 | SARS-CoV2 nsp12 | Low tissue specificity | Nucleoplasm |
| CSDE1 | SARS-CoV2 orf9b | Tissue enhanced (skeletal muscle) | Plasma membrane, Cytosol |
| CSNK2A2 | SARS-CoV2 N | Low tissue specificity | N/A |
| CSNK2B | SARS-CoV2 N | Low tissue specificity | N/A |
| CTSB |  | Tissue enhanced (thyroid gland) | Vesicles |
| CTSL |  | Tissue enhanced (placenta) | Golgi apparatus |
| CUL2 | SARS-CoV2 orf10 | Low tissue specificity | Nucleoplasm |
| CWC27 | SARS-CoV2 E | Low tissue specificity | Nucleoplasm |
| CYB5B | SARS-CoV2 nsp7 | Tissue enhanced (adrenal gland) | Endoplasmic reticulum |
| CYB5R3 | SARS-CoV2 nsp7 | Low tissue specificity | Endoplasmic reticulum |
| DCAF7 | SARS-CoV2 nsp9 | Low tissue specificity | Nucleoplasm |
| DCAKD | SARS-CoV2 nsp7 | Low tissue specificity | Nucleoplasm |
| DCTPP1 | SARS-CoV2 orf9b | Low tissue specificity | Nucleoplasm, Cytosol |
| DDX10 | SARS-CoV2 nsp8 | Low tissue specificity | Nucleoli |
| DDX21 | SARS-CoV2 N | Low tissue specificity | Nucleoli |
| DNAJC11 | SARS-CoV2 nsp4 | Low tissue specificity | Cytosol |
| DNAJC19 | SARS-CoV2 nsp7 | Low tissue specificity | N/A |
| DNMT1 | SARS-CoV2 orf8 | Low tissue specificity | Nucleoplasm |
| DPH5 | SARS-CoV2 orf9b | Low tissue specificity | Golgi apparatus |
| DPY19L1 | SARS-CoV2 orf9c | Low tissue specificity | Vesicles |
| ECSIT | SARS-CoV2 orf9c | Low tissue specificity | Nucleoplasm |
| EDEM3 | SARS-CoV2 orf8 | Low tissue specificity | Endoplasmic reticulum |
| EIF4E2 | SARS-CoV2 nsp2 | Low tissue specificity | Mitochondria |
| EIF4H | SARS-CoV2 nsp9 | Low tissue specificity | Nucleoplasm, Nuclear bodies, Cytosol |
| ELOB | SARS-CoV2 orf10 | Low tissue specificity | N/A |
| ELOC | SARS-CoV2 orf10 | Low tissue specificity | Vesicles |
| EMC1 | SARS-CoV2 orf8 | Low tissue specificity | N/A |
| ERC1 | SARS-CoV2 nsp13 | Low tissue specificity | Cytosol |
| ERGIC1 | SARS-CoV2 nsp10 | Low tissue specificity | Nucleoplasm, Vesicles |
| ERLEC1 | SARS-CoV2 orf8 | Low tissue specificity | N/A |
| ERMP1 | SARS-CoV2 orf9c | Tissue enhanced (parathyroid gland) | N/A |
| ERO1B | SARS-CoV2 orf8 | Tissue enriched (pancreas) | N/A |
| ERP44 | SARS-CoV2 orf8 | Low tissue specificity | N/A |
| ETFA | SARS-CoV2 M | Low tissue specificity | Mitochondria |
| EXOSC2 | SARS-CoV2 nsp8 | Low tissue specificity | Nucleoplasm, Nucleoli |
| EXOSC3 | SARS-CoV2 nsp8 | Low tissue specificity | Nucleoplasm |
| EXOSC5 | SARS-CoV2 nsp8 | Low tissue specificity | Nucleoli |
| EXOSC8 | SARS-CoV2 nsp8 | Low tissue specificity | Nucleoli fibrillar center, Vesicles |
| F2RL1 | SARS-CoV2 orf9c | Tissue enhanced (intestine) | Plasma membrane |
| FAM162A | SARS-CoV2 nsp7 | Low tissue specificity | Mitochondria, Cytosol |
| FAM8A1 | SARS-CoV2 M | Low tissue specificity | Golgi apparatus |
| FAM98A | SARS-CoV2 N | Low tissue specificity | Vesicles |
| FAR2 | SARS-CoV2 orf9c | Low tissue specificity | Golgi apparatus |
| FASTKD5 | SARS-CoV2 M | Low tissue specificity | N/A |
| FBLN5 | SARS-CoV2 nsp9 | Low tissue specificity | Plasma membrane |
| FBN1 | SARS-CoV2 nsp9 | Tissue enhanced (placenta) | Cytosol |
| FBN2 | SARS-CoV2 nsp9 | Tissue enriched (placenta) | Cytosol |
| FBXL12 | SARS-CoV2 orf8 | Tissue enhanced (lymphoid tissue) | Mitochondria |
| FKBP10 | SARS-CoV2 orf8 | Low tissue specificity | Vesicles |
| FKBP15 | SARS-CoV2 nsp2 | Low tissue specificity | Nucleoli |
| FKBP7 | SARS-CoV2 orf8 | Low tissue specificity | Endoplasmic reticulum |
| FOXRED2 | SARS-CoV2 orf8 | Low tissue specificity | N/A |
| FYCO1 | SARS-CoV2 nsp13 | Tissue enhanced (skeletal muscle) | Vesicles |
| G3BP1 | SARS-CoV2 N | Low tissue specificity | Cytosol |
| G3BP2 | SARS-CoV2 N | Low tissue specificity | Cytosol |
| GCC1 | SARS-CoV2 nsp13 | Low tissue specificity | Golgi apparatus |
| GCC2 | SARS-CoV2 nsp13 | Low tissue specificity | Golgi apparatus |
| GDF15 | SARS-CoV2 orf8 | Tissue enriched (placenta) | Golgi apparatus |
| GFER | SARS-CoV2 nsp10 | Low tissue specificity | Mitochondria, Cytosol |
| GGCX | SARS-CoV2 M | Tissue enriched (liver) | N/A |
| GGH | SARS-CoV2 orf8 | Tissue enhanced (kidney, liver) | N/A |
| GHITM | SARS-CoV2 orf9c | Low tissue specificity | Mitochondria |
| GIGYF2 | SARS-CoV2 nsp2 | Low tissue specificity | Cytosol |
| GLA | SARS-CoV2 nsp14 | Low tissue specificity | N/A |
| GNB1 | SARS-CoV2 nsp7 | Low tissue specificity | Plasma membrane |
| GNG5 | SARS-CoV2 nsp7 | Low tissue specificity | N/A |
| GOLGA2 | SARS-CoV2 nsp13 | Low tissue specificity | Golgi apparatus |
| GOLGA3 | SARS-CoV2 nsp13 | Low tissue specificity | Golgi apparatus |
| GOLGA7 | SARS-CoV2 Spike | Low tissue specificity | N/A |
| GOLGB1 | SARS-CoV2 nsp13 | Low tissue specificity | Golgi apparatus |
| GORASP1 | SARS-CoV2 nsp13 | Low tissue specificity | Golgi apparatus |
| GPAA1 | SARS-CoV2 orf9c | Low tissue specificity | N/A |
| GRIPAP1 | SARS-CoV2 nsp13 | Low tissue specificity | Vesicles, Cytosol |
| GRPEL1 | SARS-CoV2 nsp10 | Low tissue specificity | Mitochondria |
| GTF2F2 | SARS-CoV2 nsp9 | Low tissue specificity | Nucleoplasm |
| HDAC2 | SARS-CoV2 nsp5 | Low tissue specificity | Nucleoplasm |
| HEATR3 | SARS-CoV2 orf7a | Low tissue specificity | Nucleoplasm |
| HECTD1 | SARS-CoV2 nsp8 | Low tissue specificity | Nucleoplasm, Nucleoli |
| HMOX1 | SARS-CoV2 orf3a | Tissue enhanced (lymphoid tissue) | Golgi apparatus, Plasma membrane |
| HOOK1 | SARS-CoV2 nsp13 | Tissue enhanced (liver) | N/A |
| HS2ST1 | SARS-CoV2 nsp7 | Low tissue specificity | Mitochondria |
| HS6ST2 | SARS-CoV2 orf8 | Tissue enhanced (brain, kidney, ovary) | Nucleoplasm |
| HSBP1 | SARS-CoV2 nsp13 | Low tissue specificity | N/A |
| HYOU1 | SARS-CoV2 orf8 | Tissue enhanced (liver) | N/A |
| IDE | SARS-CoV2 nsp4 | Low tissue specificity | N/A |
| IL17RA | SARS-CoV2 orf8 | Tissue enhanced (lymphoid tissue) | Nucleoplasm, Cytosol |
| IMPDH2 | SARS-CoV2 nsp14 | Low tissue specificity | Cytosol |
| INHBE | SARS-CoV2 orf8 | Tissue enriched (liver) | Vesicles |
| INTS4 | SARS-CoV2 M | Low tissue specificity | Nucleoli |
| ITGB1 | SARS-CoV2 orf8 | Low tissue specificity | Plasma membrane, Focal adhesion sites |
| JAKMIP1 | SARS-CoV2 nsp13 | Tissue enhanced (blood, brain) | N/A |
| KDELC1 | SARS-CoV2 orf8 | Low tissue specificity | Nucleoplasm |
| KDELC2 | SARS-CoV2 orf8 | Tissue enhanced (placenta) | Nucleoplasm |
| LARP1 | SARS-CoV2 N | Low tissue specificity | Nucleoplasm, Endoplasmic reticulum, Cytosol |
| LARP4B | SARS-CoV2 nsp12 | Low tissue specificity | Cytosol |
| LARP7 | SARS-CoV2 nsp8 | Low tissue specificity | Nucleoplasm, Cytosol |
| LMAN2 | SARS-CoV2 nsp7 | Low tissue specificity | N/A |
| LOX | SARS-CoV2 orf8 | Low tissue specificity | Endoplasmic reticulum |
| MAP7D1 | SARS-CoV2 orf10 | Tissue enhanced (skeletal muscle) | Microtubules, Cytosol |
| 1-Mar | SARS-CoV2 nsp7 | Tissue enhanced (adipose tissue, breast) | Mitochondria |
| MARK1 | SARS-CoV2 orf9b | Low tissue specificity | N/A |
| MARK2 | SARS-CoV2 orf9b | Low tissue specificity | Plasma membrane |
| MARK3 | SARS-CoV2 orf9b | Low tissue specificity | N/A |
| MAT2B | SARS-CoV2 nsp9 | Low tissue specificity | Plasma membrane |
| MDN1 | SARS-CoV2 orf7a | Low tissue specificity | Nucleoli, Cytosol |
| MEPCE | SARS-CoV2 nsp8 | Low tissue specificity | Nucleoplasm |
| MFGE8 | SARS-CoV2 orf8 | Low tissue specificity | Cytosol |
| MIB1 | SARS-CoV2 nsp9 | Low tissue specificity | Plasma membrane |
| MIPOL1 | SARS-CoV2 nsp13 | Low tissue specificity | Cytosol |
| MOGS | SARS-CoV2 nsp7 | Low tissue specificity | Endoplasmic reticulum |
| MOV10 | SARS-CoV2 N | Low tissue specificity | Cytosol |
| MPHOSPH10 | SARS-CoV2 nsp8 | Low tissue specificity | Nucleoli |
| MRPS2 | SARS-CoV2 nsp8 | Low tissue specificity | Mitochondria |
| MRPS25 | SARS-CoV2 nsp8 | Low tissue specificity | Mitochondria |
| MRPS27 | SARS-CoV2 nsp8 | Low tissue specificity | Nucleoplasm, Mitochondria |
| MRPS5 | SARS-CoV2 nsp8 | Low tissue specificity | Mitochondria |
| MTCH1 | SARS-CoV2 orf6 | Low tissue specificity | N/A |
| MYCBP2 | SARS-CoV2 nsp12 | Low tissue specificity | Nucleoplasm |
| NARS2 | SARS-CoV2 nsp8 | Low tissue specificity | Nucleoplasm, Mitochondria |
| NAT14 | SARS-CoV2 nsp7 | Tissue enhanced (lymphoid tissue) | Mitochondria |
| NDFIP2 | SARS-CoV2 orf9c | Low tissue specificity | Vesicles |
| NDUFAF1 | SARS-CoV2 orf9c | Low tissue specificity | Cytosol |
| NDUFAF2 | SARS-CoV2 nsp7 | Low tissue specificity | Mitochondria |
| NDUFB9 | SARS-CoV2 orf9c | Tissue enhanced (skeletal muscle) | Mitochondria |
| NEK9 | SARS-CoV2 nsp9 | Low tissue specificity | Mitochondria |
| NEU1 | SARS-CoV2 orf8 | Low tissue specificity | Vesicles |
| NGDN | SARS-CoV2 nsp8 | Low tissue specificity | Nucleoli, Mitochondria |
| NGLY1 | SARS-CoV2 orf8 | Low tissue specificity | N/A |
| NIN | SARS-CoV2 nsp13 | Low tissue specificity | Centrosome |
| NINL | SARS-CoV2 nsp13 | Low tissue specificity | Cytokinetic bridge, Cytosol |
| NLRX1 | SARS-CoV2 orf9c | Tissue enhanced (esophagus, lymphoid tissue, tongue) | Mitochondria |
| NOL10 | SARS-CoV2 nsp8 | Low tissue specificity | Nucleoli |
| NPC2 | SARS-CoV2 orf8 | Tissue enriched (epididymis) | N/A |
| NPTX1 | SARS-CoV2 orf8 | Tissue enriched (brain) | N/A |
| NSD2 | SARS-CoV2 nsp8 | Low tissue specificity | Nucleoplasm |
| NUP210 | SARS-CoV2 nsp4 | Tissue enhanced (bone marrow, lymphoid tissue) | N/A |
| NUP214 | SARS-CoV2 nsp9 | Tissue enhanced (blood) | Nucleoplasm |
| NUP54 | SARS-CoV2 nsp9 | Low tissue specificity | Nucleoplasm |
| NUP58 | SARS-CoV2 nsp9 | Low tissue specificity | N/A |
| NUP62 | SARS-CoV2 nsp9 | Low tissue specificity | Nuclear membrane |
| NUP88 | SARS-CoV2 nsp9 | Low tissue specificity | Nucleoplasm |
| NUP98 | SARS-CoV2 orf6 | Low tissue specificity | Nucleoplasm |
| NUTF2 | SARS-CoV2 nsp15 | Low tissue specificity | Microtubules |
| OS9 | SARS-CoV2 orf8 | Low tissue specificity | Endoplasmic reticulum |
| PABPC1 | SARS-CoV2 N | Low tissue specificity | Cytosol |
| PABPC4 | SARS-CoV2 N | Tissue enhanced (pancreas, skeletal muscle) | Cytosol |
| PCNT | SARS-CoV2 nsp13 | Tissue enriched (skeletal muscle) | Centrosome |
| PCSK6 | SARS-CoV2 orf8 | Tissue enhanced (brain, liver, lymphoid tissue) | N/A |
| PDE4DIP | SARS-CoV2 nsp13 | Group enriched (heart muscle, skeletal muscle) | Golgi apparatus |
| PDZD11 | SARS-CoV2 nsp12 | Low tissue specificity | N/A |
| PIGO | SARS-CoV2 orf9c | Low tissue specificity | Nucleoli |
| PIGS | SARS-CoV2 orf9c | Low tissue specificity | N/A |
| PITRM1 | SARS-CoV2 M | Low tissue specificity | Mitochondria |
| PKP2 | SARS-CoV2 nsp1 | Tissue enriched (heart muscle) | Cell Junctions |
| PLAT | SARS-CoV2 orf8 | Tissue enhanced (parathyroid gland) | Actin filaments |
| PLD3 | SARS-CoV2 orf8 | Low tissue specificity | Endoplasmic reticulum, Cytosol |
| PLEKHA5 | SARS-CoV2 nsp12 | Low tissue specificity | Nucleoplasm, Cytosol |
| PLEKHF2 | SARS-CoV2 orf8 | Low tissue specificity | N/A |
| PLOD2 | SARS-CoV2 orf8 | Tissue enhanced (liver) | Nucleoli, Cytosol |
| PMPCA | SARS-CoV2 M | Low tissue specificity | Mitochondria |
| PMPCB | SARS-CoV2 M | Low tissue specificity | Mitochondria |
| POFUT1 | SARS-CoV2 orf8 | Low tissue specificity | Centrosome |
| POLA1 | SARS-CoV2 nsp1 | Low tissue specificity | Nucleoplasm |
| POLA2 | SARS-CoV2 nsp1 | Low tissue specificity | Nucleoplasm |
| POR | SARS-CoV2 nsp2 | Tissue enhanced (liver) | Nucleoplasm, Vesicles |
| PPIL3 | SARS-CoV2 nsp12 | Low tissue specificity | Nucleoplasm |
| PPT1 | SARS-CoV2 orf10 | Low tissue specificity | Golgi apparatus, Vesicles |
| PRIM1 | SARS-CoV2 nsp1 | Low tissue specificity | Vesicles |
| PRIM2 | SARS-CoV2 nsp1 | Tissue enhanced (lymphoid tissue, prostate) | Nucleoplasm |
| PRKACA | SARS-CoV2 nsp13 | Low tissue specificity | Cytosol |
| PRKAR2A | SARS-CoV2 nsp13 | Tissue enhanced (testis) | N/A |
| PRKAR2B | SARS-CoV2 nsp13 | Group enriched (adipose tissue, breast) | Mitochondria |
| PRRC2B | SARS-CoV2 nsp12 | Low tissue specificity | Nuclear bodies, Cytosol |
| PSMD8 | SARS-CoV2 M | Low tissue specificity | Cytosol |
| PTBP2 | SARS-CoV2 orf9b | Low tissue specificity | Nucleoplasm |
| PTGES2 | SARS-CoV2 nsp7 | Tissue enhanced (skeletal muscle) | Mitochondria |
| PUSL1 | SARS-CoV2 orf8 | Low tissue specificity | Vesicles |
| PVR | SARS-CoV2 orf8 | Tissue enhanced (liver) | Nucleoplasm, Vesicles, Plasma membrane |
| QSOX2 | SARS-CoV2 nsp7 | Low tissue specificity | Golgi apparatus |
| RAB10 | SARS-CoV2 nsp7 | Low tissue specificity | N/A |
| RAB14 | SARS-CoV2 nsp7 | Low tissue specificity | Vesicles |
| RAB18 | SARS-CoV2 nsp7 | Low tissue specificity | N/A |
| RAB1A | SARS-CoV2 nsp7 | Low tissue specificity | Endoplasmic reticulum, Cytosol |
| RAB2A | SARS-CoV2 nsp7 | Low tissue specificity | N/A |
| RAB5C | SARS-CoV2 nsp7 | Low tissue specificity | Endosomes |
| RAB7A | SARS-CoV2 nsp7 | Low tissue specificity | Lysosomes |
| RAB8A | SARS-CoV2 nsp7 | Low tissue specificity | Nucleoplasm, Plasma membrane |
| RAE1 | SARS-CoV2 orf6 | Tissue enhanced (testis) | Nucleoli fibrillar center |
| RALA | SARS-CoV2 nsp7 | Low tissue specificity | Plasma membrane |
| RAP1GDS1 | SARS-CoV2 nsp2 | Low tissue specificity | Cytosol |
| RBM28 | SARS-CoV2 N | Low tissue specificity | Nucleoli |
| RBM41 | SARS-CoV2 nsp12 | Low tissue specificity | Nuclear speckles, Cytosol |
| RBX1 | SARS-CoV2 orf10 | Low tissue specificity | Nucleoplasm |
| RDX | SARS-CoV2 nsp13 | Tissue enhanced (adrenal gland) | Plasma membrane |
| REEP5 | SARS-CoV2 M | Low tissue specificity | Endoplasmic reticulum |
| REEP6 | SARS-CoV2 M | Tissue enhanced (intestine, liver, testis) | Endoplasmic reticulum |
| RETREG3 | SARS-CoV2 orf9c | Low tissue specificity | Nucleoplasm, Nuclear membrane |
| RHOA | SARS-CoV2 nsp7 | Low tissue specificity | Plasma membrane, Cytosol |
| RIPK1 | SARS-CoV2 nsp12 | Low tissue specificity | Plasma membrane, Cytosol |
| RNF41 | SARS-CoV2 nsp15 | Low tissue specificity | Nucleoplasm, Nuclear bodies |
| RPL36 | SARS-CoV2 N | Low tissue specificity | Endoplasmic reticulum, Cytosol |
| RRP9 | SARS-CoV2 N | Low tissue specificity | Nucleoplasm |
| RTN4 | SARS-CoV2 M | Low tissue specificity | Endoplasmic reticulum |
| SAAL1 | SARS-CoV2 M | Low tissue specificity | Nucleoplasm |
| SBNO1 | SARS-CoV2 nsp12 | Tissue enhanced (testis) | Nucleoplasm |
| SCAP | SARS-CoV2 orf9c | Low tissue specificity | N/A |
| SCARB1 | SARS-CoV2 nsp7 | Tissue enhanced (adrenal gland, liver, placenta) | Vesicles |
| SCCPDH | SARS-CoV2 nsp7 | Tissue enhanced (blood) | Vesicles |
| SDF2 | SARS-CoV2 orf8 | Low tissue specificity | Vesicles |
| SELENOS | SARS-CoV2 nsp7 | Low tissue specificity | Endoplasmic reticulum |
| SEPSECS | SARS-CoV2 nsp8 | Tissue enhanced (liver) | Vesicles |
| SIGMAR1 | SARS-CoV2 nsp6 | Tissue enhanced (liver) | N/A |
| SIL1 | SARS-CoV2 orf8 | Low tissue specificity | N/A |
| SIRT5 | SARS-CoV2 nsp14 | Low tissue specificity | Mitochondria |
| SLC25A21 | SARS-CoV2 M | Tissue enhanced (testis) | N/A |
| SLC27A2 | SARS-CoV2 nsp2 | Tissue enriched (liver) | N/A |
| SLC30A6 | SARS-CoV2 orf9c | Low tissue specificity | Golgi apparatus |
| SLC30A7 | SARS-CoV2 M | Low tissue specificity | Golgi apparatus |
| SLC30A9 | SARS-CoV2 M | Low tissue specificity | N/A |
| SLC44A2 | SARS-CoV2 E | Low tissue specificity | Vesicles, Cell Junctions |
| SLC9A3R1 | SARS-CoV2 orf9b | Low tissue specificity | Plasma membrane |
| SLU7 | SARS-CoV2 nsp12 | Low tissue specificity | Nucleoplasm |
| SMOC1 | SARS-CoV2 orf8 | Tissue enhanced (brain, liver) | Plasma membrane |
| SNIP1 | SARS-CoV2 N | Low tissue specificity | Nucleoplasm |
| SPART | SARS-CoV2 nsp9 | Low tissue specificity | Cytosol |
| SRP19 | SARS-CoV2 nsp8 | Low tissue specificity | N/A |
| SRP54 | SARS-CoV2 nsp8 | Low tissue specificity | Cytosol |
| SRP72 | SARS-CoV2 nsp8 | Low tissue specificity | N/A |
| STC2 | SARS-CoV2 orf8 | Tissue enhanced (breast, pancreas) | Endoplasmic reticulum |
| STOM | SARS-CoV2 M | Low tissue specificity | Plasma membrane |
| STOML2 | SARS-CoV2 orf3b | Low tissue specificity | Plasma membrane, Cytosol |
| SUN2 | SARS-CoV2 orf3a | Low tissue specificity | Nuclear membrane |
| TAPT1 | SARS-CoV2 orf9c | Low tissue specificity | Vesicles |
| TARS2 | SARS-CoV2 M | Low tissue specificity | Nucleoplasm, Cytosol |
| TBCA | SARS-CoV2 nsp11 | Low tissue specificity | Microtubules |
| TBK1 | SARS-CoV2 nsp13 | Low tissue specificity | Nucleoplasm |
| TBKBP1 | SARS-CoV2 nsp13 | Low tissue specificity | Nucleoplasm |
| TCF12 | SARS-CoV2 nsp12 | Tissue enhanced (lymphoid tissue) | Nucleoplasm, Nuclear speckles |
| THTPA | SARS-CoV2 orf10 | Low tissue specificity | Nucleoplasm |
| TIMM10 | SARS-CoV2 nsp4 | Low tissue specificity | Mitochondria |
| TIMM10B | SARS-CoV2 nsp4 | Low tissue specificity | N/A |
| TIMM29 | SARS-CoV2 nsp4 | Low tissue specificity | Mitochondria |
| TIMM8B | SARS-CoV2 orf10 | Low tissue specificity | N/A |
| TIMM9 | SARS-CoV2 nsp4 | Low tissue specificity | Mitochondria |
| TLE1 | SARS-CoV2 nsp13 | Low tissue specificity | Nucleoplasm |
| TLE3 | SARS-CoV2 nsp13 | Low tissue specificity | Nucleoplasm |
| TM2D3 | SARS-CoV2 orf8 | Low tissue specificity | Nucleoplasm |
| TMED5 | SARS-CoV2 orf9c | Low tissue specificity | N/A |
| TMEM39B | SARS-CoV2 orf9c | Low tissue specificity | Vesicles |
| TMEM97 | SARS-CoV2 orf9c | Tissue enriched (pancreas) | Endoplasmic reticulum |
| TMPRSS2 |  | Tissue enhanced (intestine, pancreas, prostate) | Cell Junctions |
| TOMM70 | SARS-CoV2 orf9b | Low tissue specificity | Mitochondria |
| TOR1A | SARS-CoV2 orf8 | Low tissue specificity | Nuclear membrane, Vesicles |
| TOR1AIP1 | SARS-CoV2 nsp7 | Low tissue specificity | Nuclear membrane |
| TRIM59 | SARS-CoV2 orf3a | Tissue enhanced (brain, lymphoid tissue) | Rods & Rings |
| TRMT1 | SARS-CoV2 nsp5_C145A | Low tissue specificity | Plasma membrane, Cytosol |
| TUBGCP2 | SARS-CoV2 M | Low tissue specificity | Nucleoplasm, Centrosome |
| TUBGCP3 | SARS-CoV2 M | Low tissue specificity | N/A |
| TYSND1 | SARS-CoV2 nsp12 | Tissue enhanced (testis) | Nucleoplasm, Centrosome |
| UBAP2 | SARS-CoV2 nsp12 | Low tissue specificity | Cytosol |
| UBAP2L | SARS-CoV2 nsp12 | Low tissue specificity | Nuclear speckles, Cytosol |
| UBXN8 | SARS-CoV2 orf9c | Tissue enhanced (ovary) | Endoplasmic reticulum |
| UGGT2 | SARS-CoV2 orf8 | Low tissue specificity | N/A |
| UPF1 | SARS-CoV2 N | Low tissue specificity | Nucleoplasm |
| USP13 | SARS-CoV2 nsp13 | Tissue enhanced (heart muscle, skeletal muscle) | Nucleoplasm, Cytosol |
| USP54 | SARS-CoV2 nsp12 | Tissue enhanced (brain) | Mitochondria |
| VPS11 | SARS-CoV2 orf3a | Low tissue specificity | Cytosol |
| VPS39 | SARS-CoV2 orf3a | Low tissue specificity | N/A |
| WASHC4 | SARS-CoV2 nsp2 | Low tissue specificity | Nucleoplasm |
| WFS1 | SARS-CoV2 orf9c | Low tissue specificity | N/A |
| YIF1A | SARS-CoV2 M | Tissue enhanced (liver) | Vesicles |
| ZC3H18 | SARS-CoV2 E | Low tissue specificity | Nuclear speckles |
| ZC3H7A | SARS-CoV2 nsp12 | Low tissue specificity | Cytosol |
| ZDHHC5 | SARS-CoV2 Spike | Low tissue specificity | Plasma membrane |
| ZNF318 | SARS-CoV2 nsp12 | Low tissue specificity | Nucleoplasm |
| ZNF503 | SARS-CoV2 nsp9 | Low tissue specificity | Plasma membrane, Cytosol |
| ZYG11B | SARS-CoV2 orf10 | Tissue enhanced (skeletal muscle) | Golgi apparatus, Intermediate filaments |
